# Supplementary material for: Variant Signal Peptides of Vaccine Antigen, FHbp, Impair Processing Affecting Surface Localization and Antibody-Mediated Killing in Most Meningococcal Isolates
Source: PubMed Central journal article supplement (PMC6930937; doi:10.3389/fmicb.2019.02847), 2019-12-19
Supplement: Table_1.pdf [file Table_1.pdf]

```

10 20 30 40 50 60 70 80 90 100 110 120
MC58      MTRSKVAKRTAPCCCLSLTTALILTACS---SQQGQVANDIGAGLADALTAPDKKIKLQSLTLDQSVKQEKIKLAKQGAETKTPKQD---SLWTKLKLQKRVSRDFIRQLSDQDQ
L91543    F..A.....
Strain 1|H44/76
Strain 2|ML0_240684
Strain 3|ML0_240701
Strain 4|ML02_241729
Strain 5|ML0_240579
Strain 6|ML3_240525
Strain 7|ML04_241215
Strain 8|ML1_241066
Strain 9|ML3_240614
Strain 10|ML0_240750
Strain 11|ML3_240675
Strain 12|ML1_240236
Strain 13|ML2_240006
Strain 14|ML1_241033
Strain 15|ML4_240367
Strain 16|ML02_240210
Strain 17|ML1_240077
Strain 18|ML3_240486

```

```

130 140 150 160 170 180 190 200 210 220 230 240
MC58      LTTLSQKQEVVYDQSHSALTAPQVQVQVSEKSSVAVKQKQFRIQDIDAGETSIFDKLPEKQKATVPTATPSSDQAGKLTPTIDFNAGQKQKIEKLSKLPKLVQDLSQDQKQKAV
L91543    L..V..D.....K..S.....H.....E..T..Y..E.....
Strain 1|H44/76
Strain 2|ML0_240684
Strain 3|ML0_240701
Strain 4|ML02_241729
Strain 5|ML0_240579
Strain 6|ML3_240525
Strain 7|ML04_241215
Strain 8|ML1_241066
Strain 9|ML3_240614
Strain 10|ML0_240750
Strain 11|ML3_240675
Strain 12|ML1_240236
Strain 13|ML2_240006
Strain 14|ML1_241033
Strain 15|ML4_240367
Strain 16|ML02_240210
Strain 17|ML1_240077
Strain 18|ML3_240486

```

```

250 260 270 280 290 300 310
MC58      ISSVLPVQKQEKSSVSLTIPKQKQVAGSSVAVKQKQFRIQDIDAGETSIFDKLPEKQKATVPTATPSSDQAGKLTPTIDFNAGQKQKIEKLSKLPKLVQDLSQDQKQKAV
L91543    D...Q...E..A..K...I...L...K...L...K...
Strain 1|H44/76
Strain 2|ML0_240684
Strain 3|ML0_240701
Strain 4|ML02_241729
Strain 5|ML0_240579
Strain 6|ML3_240525
Strain 7|ML04_241215
Strain 8|ML1_241066
Strain 9|ML3_240614
Strain 10|ML0_240750
Strain 11|ML3_240675
Strain 12|ML1_240236
Strain 13|ML2_240006
Strain 14|ML1_241033
Strain 15|ML4_240367
Strain 16|ML02_240210
Strain 17|ML1_240077
Strain 18|ML3_240486

```

| Strain | Similarity (%) |
|--------|----------------|
| 1      | 100            |
| 2      | 97             |
| 3      | 97             |
| 4      | 94             |
| 5      | 96             |
| 6      | 96             |
| 7      | 96             |
| 8      | 96             |
| 9      | 96             |
| L91543 | 93             |
| 10     | 92             |
| 11     | 92             |
| 12     | 94             |
| 13     | 94             |
| 14     | 86             |
| 15     | 86             |
| 16     | 86             |
| 17     | 86             |
| 18     | 86             |
